# Supplementary material for: The sensing mechanism of pristine and transition metals doped Zn12O12, Sn12O12 and Ni12O12 nanocages towards NH3 and PH3: a DFT study
Source: Royal Society of Chemistry journal article supplement (doi:10.1039/d1tc04135e), 2021-01-01
Supplement: d1tc04135e1.pdf [file d1tc04135e1.pdf]

The sensing mechanism of pristine and transition metals doped  $Zn_{12}O_{12}$ ,  
 $Sn_{12}O_{12}$  and  $Ni_{12}O_{12}$  nanocages towards  $NH_3$  and  $PH_3$ : A DFT study

Yuanchao Li <sup>a</sup>, Xin Li\* <sup>a</sup>, Yanling Xu<sup>b</sup>

\* Corresponding authors

a. MIIT Key Laboratory of Critical Materials Technology for New Energy Conversion and Storage, School of Chemistry and Chemical Engineering, State Key Lab of Urban Water Resource and Environment, Harbin Institute of Technology, Harbin 150090, China

E-mail: [lixin@hit.edu.cn](mailto:lixin@hit.edu.cn) Tel:+86-0451-86282153

b. School of Chemistry and Chemical Engineering, Harbin Institute of Technology, Harbin 150090, China

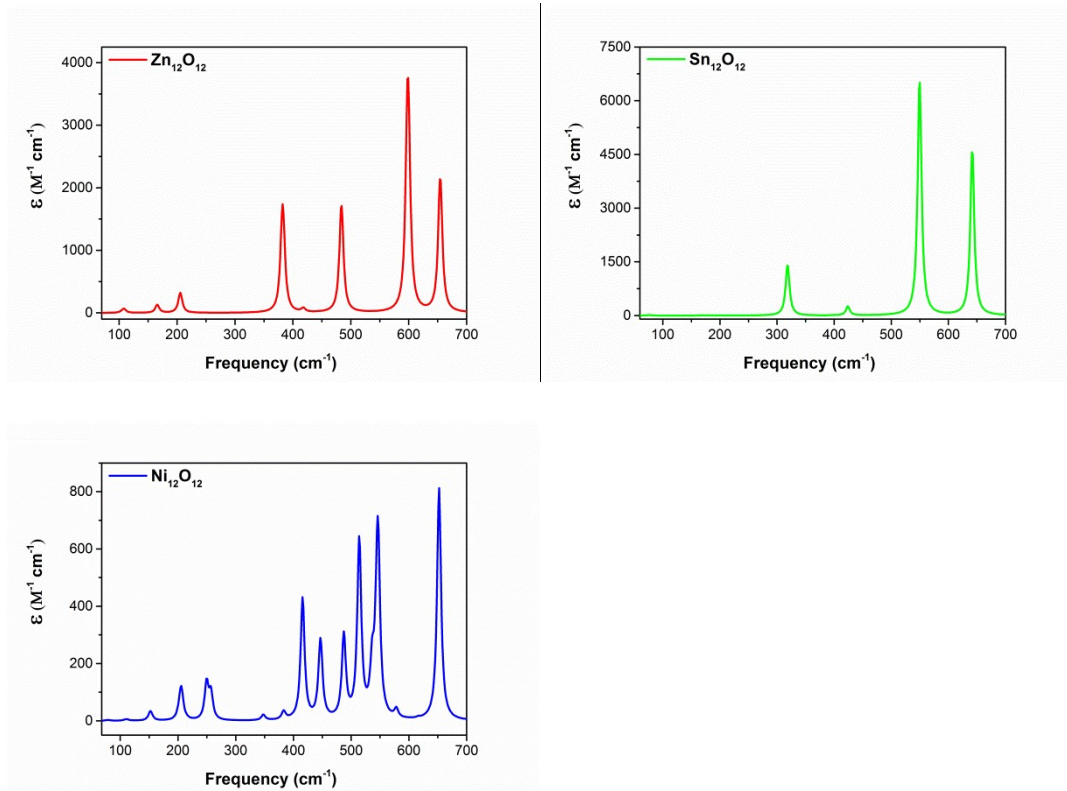

**Fig. S1.** Vibrational spectra of  $\text{Zn}_{12}\text{O}_{12}$ ,  $\text{Sn}_{12}\text{O}_{12}$  and  $\text{Ni}_{12}\text{O}_{12}$  nanocages.

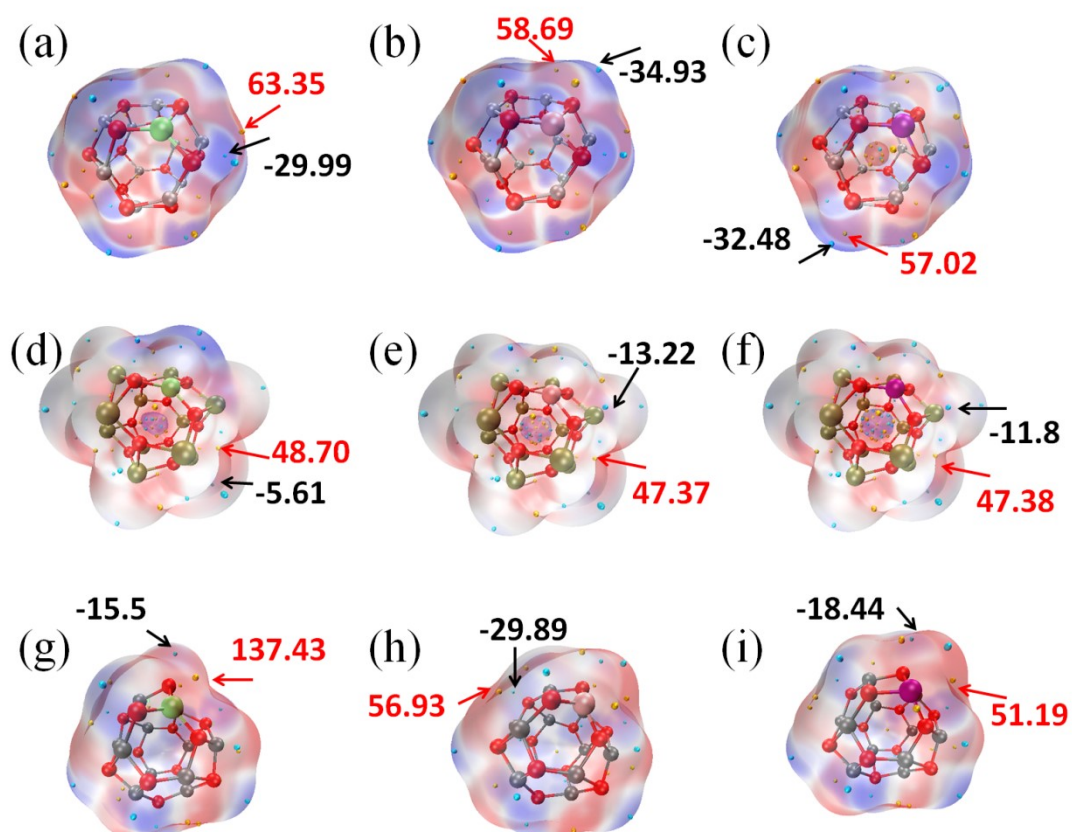

**Fig. S2.** ESP surfaces of (a)  $\text{Zn}_{11}\text{TiO}_{12}$ , (b)  $\text{Zn}_{11}\text{CrO}_{12}$ , (c)  $\text{Zn}_{11}\text{FeO}_{12}$ , (d)  $\text{Sn}_{11}\text{TiO}_{12}$ , (e)  $\text{Sn}_{11}\text{CrO}_{12}$ , (f)  $\text{Sn}_{11}\text{FeO}_{12}$ , (g)  $\text{Ni}_{11}\text{TiO}_{12}$ , (h)  $\text{Ni}_{11}\text{CrO}_{12}$ , and (i)  $\text{Ni}_{11}\text{FeO}_{12}$ , respectively.

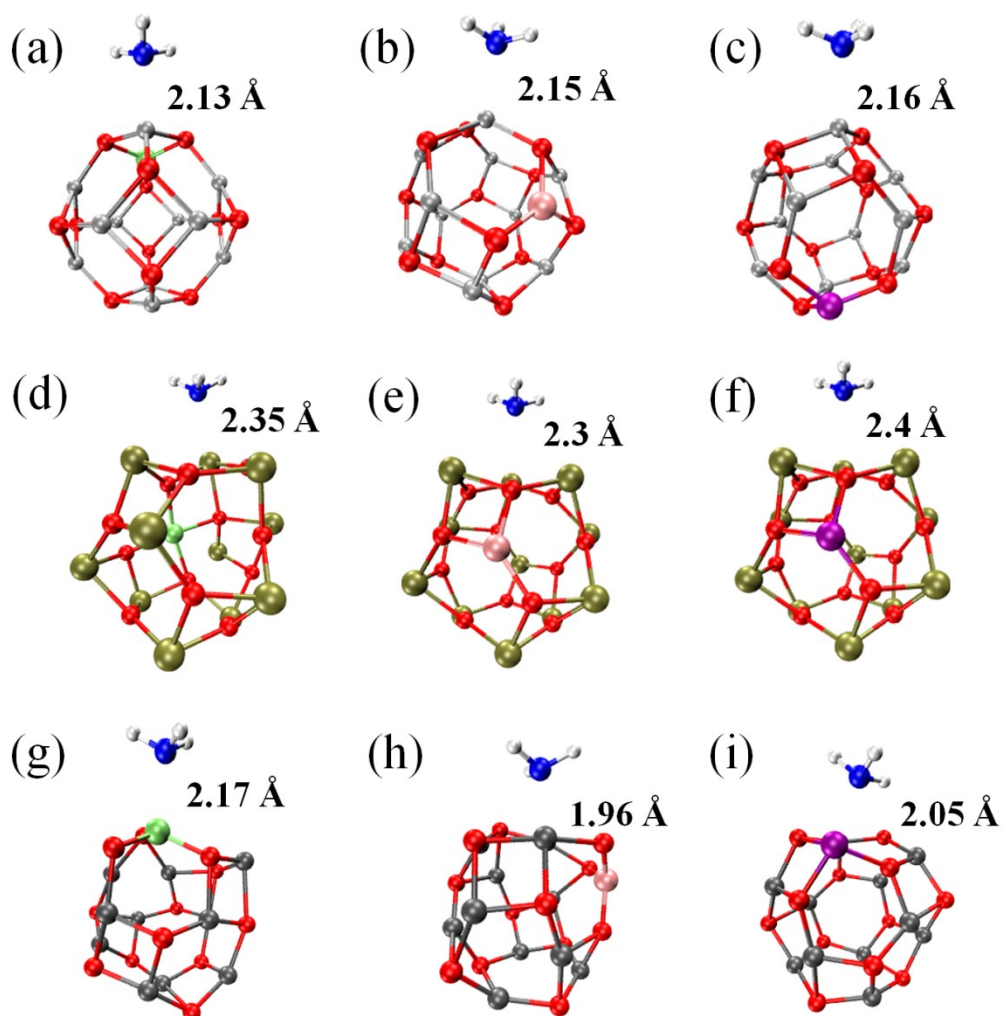

**Fig. S3.** The stable structures for the adsorption of  $\text{NH}_3$  on (a)  $\text{Zn}_{11}\text{TiO}_{12}$ , (b)  $\text{Zn}_{11}\text{CrO}_{12}$ , (c)  $\text{Zn}_{11}\text{FeO}_{12}$ , (d)  $\text{Sn}_{11}\text{TiO}_{12}$ , (e)  $\text{Sn}_{11}\text{CrO}_{12}$ , (f)  $\text{Sn}_{11}\text{FeO}_{12}$ , (g)  $\text{Ni}_{11}\text{TiO}_{12}$ , (h)  $\text{Ni}_{11}\text{CrO}_{12}$ , and (i)  $\text{Ni}_{11}\text{FeO}_{12}$ , respectively.

**Table S1** Electronic properties including energy level, energy gap, hardness ( $\eta$ ), electronic chemical potential ( $\mu$ ), electrophilicity index ( $\omega$ ) and work function ( $\Phi$ ). All parameters are in eV.

|                                                     | $E_H$ | $E_L$ | $E_g$ | $\eta$ | $\mu$ | $\omega$ | $\Phi$ | $\% \Delta \Phi$ | $\tau$                    |
|-----------------------------------------------------|-------|-------|-------|--------|-------|----------|--------|------------------|---------------------------|
| Zn <sub>11</sub> TiO <sub>12</sub>                  | -4.19 | -2.72 | 1.47  | 0.74   | -3.46 | 8.12     | 3.46   | -                | -                         |
| Zn <sub>11</sub> TiO <sub>12</sub> /NH <sub>3</sub> | -3.92 | -2.29 | 1.63  | 0.82   | -3.11 | 5.91     | 3.11   | -10.12           | 1.2 × 10 <sup>6</sup> s   |
| Zn <sub>11</sub> CrO <sub>12</sub>                  | -4.65 | -2.74 | 1.91  | 0.96   | -3.70 | 7.15     | 3.70   | -                | -                         |
| Zn <sub>11</sub> CrO <sub>12</sub> /NH <sub>3</sub> | -4.37 | -2.34 | 2.03  | 1.02   | -3.36 | 5.54     | 3.36   | -9.19            | 3.3 × 10 <sup>3</sup> s   |
| Zn <sub>11</sub> FeO <sub>12</sub>                  | -5.39 | -2.74 | 2.65  | 1.33   | -4.07 | 6.24     | 4.07   | -                | -                         |
| Zn <sub>11</sub> FeO <sub>12</sub> /NH <sub>3</sub> | -5.10 | -2.34 | 2.76  | 1.38   | -3.72 | 5.01     | 3.72   | -8.60            | 0.5 × 10 <sup>3</sup> s   |
| Sn <sub>11</sub> TiO <sub>12</sub>                  | -3.44 | -1.76 | 1.68  | 0.84   | -2.60 | 4.02     | 2.60   | -                | -                         |
| Sn <sub>11</sub> TiO <sub>12</sub> /NH <sub>3</sub> | -4.35 | -1.93 | 2.42  | 1.21   | -3.14 | 4.07     | 3.14   | 20.77            | 1.9 × 10 <sup>11</sup> ns |
| Sn <sub>11</sub> CrO <sub>12</sub>                  | -4.94 | -1.92 | 3.02  | 1.51   | -3.43 | 3.90     | 3.43   | -                | -                         |

|                                             |       |       |      |      |       |       |      |        |                        |
|---------------------------------------------|-------|-------|------|------|-------|-------|------|--------|------------------------|
| $\text{Sn}_{11}\text{CrO}_{12}/\text{NH}_3$ | -4.72 | -1.71 | 3.01 | 1.51 | -3.22 | 3.43  | 3.22 | -6.12  | 12 ns                  |
| $\text{Sn}_{11}\text{FeO}_{12}$             | -5.89 | -2.15 | 3.74 | 1.87 | -4.02 | 4.32  | 4.02 | -      | -                      |
| $\text{Sn}_{11}\text{FeO}_{12}/\text{NH}_3$ | -5.69 | -1.96 | 3.73 | 1.87 | -3.83 | 3.92  | 3.83 | -4.73  | 104 ns                 |
| $\text{Ni}_{11}\text{TiO}_{12}$             | -6.47 | -4.88 | 1.59 | 0.80 | -5.68 | 20.26 | 5.68 | -      | -                      |
| $\text{Ni}_{11}\text{TiO}_{12}/\text{NH}_3$ | -5.67 | -4.09 | 1.58 | 0.79 | -4.88 | 15.07 | 4.88 | -14.08 | $3.5 \times 10^{17}$ s |
| $\text{Ni}_{11}\text{CrO}_{12}$             | -6.45 | -5.06 | 1.39 | 0.70 | -5.76 | 23.83 | 5.76 | -      | -                      |
| $\text{Ni}_{11}\text{CrO}_{12}/\text{NH}_3$ | -6.18 | -4.68 | 1.50 | 0.75 | -5.43 | 19.66 | 5.43 | -5.73  | $2.4 \times 10^2$ s    |
| $\text{Ni}_{11}\text{FeO}_{12}$             | -6.65 | -4.74 | 1.91 | 0.96 | -5.70 | 16.98 | 5.70 | -      | -                      |
| $\text{Ni}_{11}\text{FeO}_{12}/\text{NH}_3$ | -6.27 | -4.40 | 1.87 | 0.94 | -5.34 | 15.22 | 5.34 | -6.32  | $6.9 \times 10^8$ s    |
